# Supplementary material for: Mycobacterium microti Infection in Red Foxes in France
Source: MDPI journal article supplement (doi:10.3390/microorganisms9061257), 2021-06-09
Supplement: s1 [file s1]

**Table S1.** Results of *M. microti* detection by molecular diagnosis in tissues, when available, for each of the 28 foxes found infected. LN: lymph nodes; RP: retropharyngeal; resp: respiratory. NR: not reported. MTBC : PCR positive for *IS6110* and *IS1081*, but negative for intra-MTBC PCR (*IS1561'* and RD4)

| ID fox         | Dept      | Season | Date of capture | Sex    | Age             | LN<br>mesenteric | LN<br>RP + resp | Feces |
|----------------|-----------|--------|-----------------|--------|-----------------|------------------|-----------------|-------|
| 21 19 REN 1158 | Côte-d'Or |        | 29/08/2019      | NR     | Juvenile        | POS              | POS             | -     |
| 170410017992   | Dordogne  | #1     | 10/03/2017      | NR     | NR              | POS              | NEG             | NEG   |
| 170523024904   | Dordogne  | #1     | 10/05/2017      | Female | Adult           | POS              | POS             | -     |
| 170606026621   | Dordogne  | #1     | 31/05/2017      | NR     | NR              | POS              | NEG             | NEG   |
| 170628030558   | Dordogne  | #1     | 23/06/2017      | Male   | Adult           | POS              | NEG             | NEG   |
| 170816037525   | Dordogne  | #1     | 04/08/2017      | Male   | Adult           | POS              | POS             | NEG   |
| 170816037531   | Dordogne  | #1     | 30/07/2017      | Female | Adult           | POS              | NEG             | NEG   |
| 170818037900   | Dordogne  | #1     | 04/08/2017      | Male   | Adult           | POS              | NEG             | NEG   |
| 170823038432   | Dordogne  | #1     | 16/08/2017      | Male   | Adult           | POS              | NEG             | NEG   |
| 170829039569   | Dordogne  | #1     | 09/08/2017      | Female | Adult           | POS              | NEG             | NEG   |
| 170829039575   | Dordogne  | #1     | 11/08/2017      | Female | Adult           | POS              | NEG             | NEG   |
| 170831039977   | Dordogne  | #1     | 07/12/2017      | Male   | Adult           | POS              | MTBC            | NEG   |
| 171220055780   | Dordogne  | #1     | 26/11/2017      | Male   | NR              | POS              | POS             | NEG   |
| 180524023863   | Dordogne  | #2     | 14/05/2018      | Female | Adult           | POS              | NEG             | -     |
| 180524023865   | Dordogne  | #2     | NR              | NR     | NR              | POS              | NEG             | -     |
| 180814038268   | Dordogne  | #2     | 07/08/2018      | Male   | Adult           | POS              | NEG             | -     |
| 180814038269   | Dordogne  | #2     | 07/08/2018      | Male   | Juvenile        | MTBC             | POS             | -     |
| 190802033482   | Dordogne  | #2     | 05/08/2019      | Female | Juvenile        | POS              | NEG             | -     |
| 190802033483   | Dordogne  | #2     | 05/08/2019      | Male   | Adult           | POS              | NEG             | -     |
| 190805033807   | Dordogne  | #2     | 05/08/2019      | Female | Adult           | POS              | NEG             | -     |
| 190805033803   | Dordogne  | #2     | 11/08/2019      | Female | Juvenile        | POS              | NEG             | -     |
| 190802033486   | Dordogne  | #2     | 11/08/2019      | Female | Adult           | POS              | POS             | -     |
| 190805033804   | Dordogne  | #2     | 11/08/2019      | Male   | Adult           | POS              | NEG             | -     |
| 190417017390   | Dordogne  | #2     | 22/08/2019      | Male   | Adult           | POS              | NEG             | -     |
| 190823035959   | Dordogne  | #2     | 22/08/2019      | Male   | Adult           | POS              | NEG             | -     |
| 0238126        | Landes    |        | 10/11/2018      | Female | Juvenile        | POS              | POS             | -     |
| 2589434        | Landes    |        | 14/11/2018      | Male   | Adult           | POS              | POS             | -     |
| 199041         | Landes    |        | 27/12/2018      | Male   | NR <sup>4</sup> | POS              | NEG             | -     |
